# Supplementary material for: Keep Your Options Open: An Information-Based Driving Principle for Sensorimotor Systems
Source: PLoS One. 2008 Dec 24;3(12):e4018. doi: 10.1371/journal.pone.0004018 (PMC2607028; doi:10.1371/journal.pone.0004018)
Supplement: Appendix S1 — Information Theory (0.10 MB DOC) [file pone.0004018.s001.doc]

# Appendix S1

## Information Theory

### Introduction

In this section the central information-theoretic notions used in this paper are briefly introduced. For a detailed introduction to information theory [69] consult, for example, [70].

A *random variable* can assume various values with various probabilities. In this paper exclusively discrete random variables are considered; where continuous state spaces appear originally, they are suitably quantized before being used as random variables.

Denote random variables with uppercase letters, e.g.,, their sets of values with upright letters, e.g.,, and their values with lowercase letters, e.g., *x*. Denote composite random variables by listing their elements inside parenthesis, e.g.,with values from the set . By abuse of notation we denote, the probability that *X* assumes the value *x*, by. Similarly, the joint probability of *X* and *Y* is denoted by and the conditional probability of *X* given *Y* by.

### Entropies, Mutual Information, Channel Capacity

The *entropy* of *X*, denoted by *H*(*X*), is defined as a measure of the uncertainty of the probability distribution of *X*:

Entropy as well all other information-theoretic measures used in this paper are measured in *bits*. Note that all of the information-theoretic measures presented in this section are *non-negative*.

The *conditional entropy* of *X* given *Y*, denoted , is defined as uncertainty of *X* knowing *Y* weighted by the probability of *Y*:

The *mutual information* between *X* and *Y*, denoted, is defined as the average reduction in the uncertainty of *X* given *Y*:

It is symmetric in *X* and *Y*.

*Channel capacity* of a communication channel: consider a channel from a variable *X* to a variable *Y*, characterized by the fixed given conditional. If a distribution on *X* is given, consider, the mutual information between *X* and *Y*. The channel capacity of that channel is the maximum of this mutual information over all possible input distributions on *X*, and limits the amount of information that can be reliably transmitted through the channel: .

Consult also App. S3 for a more complete formalism of the causal aspects of a channel.
